# Supplementary material for: Blood cancer care in a resource limited setting during the Covid-19 outbreak; a single center experience from Sri Lanka
Source: PLoS One. 2021 Sep 17;16(9):e0256941. doi: 10.1371/journal.pone.0256941 (PMC8448336; doi:10.1371/journal.pone.0256941)
Supplement: S5 File — (XLSX) [file pone.0256941.s005.xlsx]

## Sheet: Sheet1
In patient episodes
Age	Gender	Reason for admission	Stay in hospital (hr)	Neutropenic or not	Covid test done or not
24	Male	BMA,investigations & blood products support	24	no
24	Male	Blood products support	24	no
24	Male	Blood products support	24	no
22	Female	Back pain	24	no
72	Female	Blood products support	12	0.17
72	Female	Blood products support	12	0.22
72	Female	Diarrhoea management and blood products support	120	0.31
72	Female	Neutropenic fever management & blood products support	120	0.49
72	Female	Blood products support	12	0.2
72	Female	Azacitidine & blood products support	72	0.15
72	Female	Blood products support	12	0.02
72	Female	URTI & blood product support	48	0.03
72	Female	Blood products support	12	0.17
72	Female	Blood products support	12	0.14
72	Female	Azacitidine,Neutropenic fever management & blood product support	168	0.12
72	Female	Neutropenic fever management & blood products support	72	0.46
72	Female	Azacitidine	24	0.08
72	Male	Inj Rituximab (#9)	24	no
72	Male	Rituximab (#10)	24	no
72	Male	JJ stenting & #1 R-CHOP	24	no
72	Male	UTI & Neutropenic fever management	72	0.07
72	Male	#2 R-CHOP	24	no
73	Male	#3 R-CHOP	24	no
73	Male	Blood product support	24	0.97
73	Male	#4 R-CHOP	24	no
73	Male	Neutropenic fever management	48	0
73	Male	#5 R-CHOP	24	no
82	Male	#3 Rituximab	12	no
82	Male	#4 Rituximab	12	no
83	Male	#5 Rituximab	12	no
83	Male	#6 Rituximab	12	no
71	Male	BMA & #1 D1 VTD	48	no
75	Male	Blood products support	24	no
71	Male	Blood products support	96	no
71	Male	Investigations & VTD	72	no
71	Male	LL swelling	24	0.61
71	Male	Fever Management	96	no
71	Male	Drowsy	72	no
71	Male	BMA & investigations (post treatment)	12	no
54	Female	BMA & investigations	24	no
76	Female	UTI	168	no
71	Female	BMA,investigations & VTD	48	no
69	Male	BMA & investigations	12	no
69	Male	VTD	168	no
69	Male	B/L LL cellulitis & blood products support	408	no
69	Male	L/L weakness	24	no
15	Female	R-CVP	24	no
15	Female	R-CVP	24	no
15	Female	R-CVP	24	no
15	Female	R-CVP	24	no
15	Female	Neutropenic management	12	no
38	Male	Neutropenic sepsis	1200	0.55, continuously N	done
59	Male	Blood products support	24	0.7
59	Male	Blood products support	12	0.56
59	Male	Blood products support	24	0.71
59	Male	Blood products support	12	0.72
59	Male	Blood products support	24	0.41
59	Male	Blood products support	24	0.2
59	Male	Neutripenic fever management	144	0.73
59	Male	Blood products support	12	0.34
59	Male	Azacitidine	12	0.42
59	Male	Blood products support	12	0.39
59	Male	Neutropenic fever	408	0.64
59	Male	Blood products support	12	0.65
59	Male	Blood products support	24	0
59	Male	Blood products support	12	0.65
59	Male	Blood products support	24	0.34
59	Male	Blood products support	120	0.56
59	Male	Blood products support	12	0.35
59	Male	Blood products support	12	0.22
59	Male	Blood product support	120	0.12
59	Male	Blood products support	48	0.08
59	Male	Blood products support	12	0.07
59	Male	Blood products support	12	0.17
59	Male	Blood products support	24	0.3
59	Male	Blood products support	24	0.1
59	Male	Blood products support	12	0.3
59	Male	Blood products support	24	0.2
59	Male	Azacitidine	24	0.46
59	Male	Azacitidine & blood products support	72	0.38
59	Male	Blood products support	24	0.13
59	Male	Neutropenic sepsis & Blood produsts support	144	0.09
59	Male	Blood products support	12	0.1
59	Male	Blood products support	24	0.36
76	Male	Neutropenic fever management	120	0.11 (till 01.10 N 7.2)	done
69	Female	Blood products support	24	no
69	Female	R chestwall abcess & blood products support	120	no
40	Male	Investigations	24	no
53	Male	Pleural fluid aspiration	24	no
77	Female	Herpes Zoster	72	no
78	Female	Femour fracture	24	no	done
78	Female	Blood products support	24	no
75	Male	Investigations	48	no
64	Male	BMA & investigations	12	no
35	Female	Non-neutropenic fever management	72	no
35	Female	FC	72	no
35	Female	Neutropenic fever management	192	0.49
35	Female	FC	48	no
35	Female	Blood product support	24	no
35	Female	FC	48	no
35	Female	Blood product support	24	0.3
35	Female	FC	48	no
35	Female	FC	48	no
35	Female	FC	48	no
13	Male	L inguinal orchodectomy, paraaortic mass incisional Bx	216	no
13	Male	Azacitidine	120	no
13	Male	Abdominal pain & fever	2472	0 (18.07 - N 1.87 04.08)
7	Male	Cyclophosphamide	24	no (1.5)
62	Female	Fever with chills	96	no	done
62	Female	VDT	120	no
62	Female	Hypokalemia	24	no
62	Female	Pre-BMT investigations	12	no
62	Female	BMT	480	no
62	Female	Blood products support	24	no
62	Female	Blood products support	24	no
67	Female	BMA & investigations	12	no
60	Male	Cladrabine	240	0.49 - until 28.08)
86	Male	BMA & investigations	12	no
75	Male	Hyperglycemia	48	no
48	Male	BMA & investigations	144	no	done
48	Male	SOB & Acitis	72	no	done
48	Male	Fever	24	no
48	Male	R-GemP	48	no
48	Male	Neutropenic fever management	24	no
48	Male	Fever Management	48	no
48	Male	R-GemP	24	no
48	Male	R-GemP	24	no
48	Male	Neutropenic fever management	72	no
48	Male	R-GemP	24	no
48	Male	R-GemP	24	no
48	Male	R-GemP	48	no
48	Male	Non neutropenic fever management	24	no
48	Male	R-GemP	96	no
69	Male	Cytarabine & Daunorubicine	696	2.29 (24.12 N 0.57 - 18.01 N 0.78)
61	Male	BMA & Bort+Len+Dexa	12	no
57	Female	R-CVP	24	no
57	Female	R-CVP	24	no
57	Female	R-CVP	24	no
57	Female	R-CVP	12	no
9	Female	Investigations	48	no	done
56	Female	BMA,Investigations & VTD	12	no
56	Female	VTD	12	no
58	Female	VTD	12	no
56	Female	VTD	12	no
56	Female	BMT	12	no
56	Female	Pre-BMT investigations	360	no (BMT 07.11 N 0.29 - 13.11 N 2.98)
59	Male	Weakness	72	no
59	Male	Sepsis management	192	no
59	Male	PR bleeding	504	no
16	Female	Investigations	12	no
42	Male	Rituximab	12	no
42	Male	Rituximab	12	no
60	Male	Rituximab	12	no
49	Male	Fever	72	no	done
49	Male	Blood products support	120	no
49	Male	Blood products support	12	no
49	Male	Blood products support	24	no
47	Female	Blood products support and Investigations	96	no
47	Female	Leg pain and hand celliulitis	72	no
84	Male	Blood products support	24	no
84	Male	Blood products support	12	no
51	Male	VTD	24	no
51	Male	Pre-BMT investigations & BMT	456	20.11 N 0.53 - 27.11 N 2.3	done
87	Male	Unsteadiness	24	no
90	Female	Blood product support	24	no
90	Female	Urosepsis, Antibiotics	168	no
73	Male	Blood products support	24	0.88
73	Male	Blood products support	24	no
73	Male	Blood products support	24	no
73	Male	Blood products support	24	0.62
73	Male	Blood products support	24	0.64
73	Male	Blood products support	24	no
73	Male	Blood products support	24	no
22	Male	BMA & investigations	12	no
22	Male	FLAG-Ida	528	15.09 N 0 - 29.09 N 1.54
19	Male	IT MTX & Vincristine (Maintenance therapy)	24	no	done
19	Male	Abdomola & back pain	72	no
19	Male	IT MTX & Vincristine (Maintenance therapy)	12	no
19	Male	IT MTX & Vincristine (Maintenance therapy)	12	no
19	Male	IT MTX & Vincristine (Maintenance therapy)	12	no
5	Female	Fever	12	no
56	Female	Hypoglycemia	48	no
42	Male	R-GemP	48	0.3
42	Male	Non neutropenic fever management	24	no
42	Male	Non neutropenic fever management	24	no
42	Male	GemP	24	no
42	Male	GemP	24	no
42	Male	GemP	24	no
42	Male	Blood product support	72	no
42	Male	GemP	24	no
79	Male	BMA	24	no
70	Male	BMA & investigations	12	no
75	Male	Blood products support	12	no
75	Male	Blood products support	12	no
75	Male	Blood products support	12	no
75	Male	Blood products support	24	no
75	Male	Blood products support	24	no
75	Male	Blood products support	24	no
75	Male	Blood products support	24	no
75	Male	Blood products support	12	no
75	Male	Blood products support	24	no
75	Male	Blood products support	120	no
77	Male	VTD	24	no
77	Male	VDT	96	no
77	Male	Neutropenic fever management	192	0.26	done
77	Male	Blood products support & Carfilzomib	144	no
77	Male	Carfilzomib	24	no
77	Male	Carfilzomib	24	no
77	Male	Carfilzomib	24	no
61	Female	BMA & investigations	48	0.96
61	Female	Mini FALG-Ida	336	0.73
70	Female	Investigations	24	no
70	Female	Cladrabine	192	no (30.06 N 0.75 - 09.07 N 0.18)
70	Female	Diarrhoea & vomotting	48	no
59	Female	R-CVP	12	no
59	Female	R-CVP	24	no
59	Female	Hydronephrosis, J-J stenting	168	no
59	Female	R-CVP	24	no
87	Male	Blood products support	72	no
87	Male	Azacitidine	120	no
87	Male	Azacitidine	12	no
48	Female	BMA & investigations	12	no
60	Female	ABVD	48	no
60	Female	Fever	24	no	done
26	Female	Investigations	12	no
26	Female	AML induction	120	no
26	Female	Neutropenia management	264	0.68 (17.06 N 2.21)
26	Female	AML Consolidation	120	no
26	Female	Neutropenia management	288	0.14 (18.07 N 1.64)
26	Female	Blood products support	12	no
26	Female	AML Consolidation	144	no
26	Female	Blood products support	288	0 (18.08 N 2.12)
26	Female	Blood products support	24	no
26	Female	Blood products support	12	no
57	Female	Investigations	12	no
75	Female	Investigations	12	0.52
38	Male	Fe ver & SOB	48	no	done
38	Male	GemP	24	no
38	Male	Blood product support	12	no
14	Female	BMA & investigations	72	0.13
79	Female	BMA	12	no
42	Male	AML induction	432	22.06 N 0.7 - till D
42	Male	AML Consolidation	432	20.07 N 0.2 - till D
42	Male	AML Consolidation	528	18.08 N 0.55 - 03.09 N 0.36
77	Male	BMA & BTD	24	no
77	Male	Blood products support	48	no	done
62	Female	Investigations	24	no
66	Female	BMA	12	0.7
62	Male	BMA & investigations	12	no
27	Female	Neutropenic fever	72	0.63
58	Female	BMA & investigations	24	no
58	Female	VTD	12	no
33	Male	R-CHOP	24	no
33	Male	R-CHOP	24	no
33	Male	R-CHOP	24	no
33	Male	R-CHOP	24	no
33	Male	R-CHOP	24	no
33	Male	R-CHOP	24	no
2	Male	Investigations	72	no
72	Female	BMA & investigations	24	no
72	Female	R-CGVP	24	no
72	Female	R-CGVP	24	no
72	Female	R-CGVP	24	no
72	Female	R-CGVP & IT MTX	24	no
72	Female	R-CGVP	24	no
72	Female	R-CGVP	24	no
70	Male	Investigations	24	no
8	Female	BMA & investigations	12	0.34
38	Female	BMA & investigations	24	no
38	Female	CVP & BMA	12	no
15	Female	Cyclophosphamide & Cytarabine	24	no
25	Male	FLAG-Ida	408	1.01 - 22.09 N 0
56	Male	BMA & investigations	48	no
12	Female	Investigations	96	no
62	Male	Cladrabine	216	0.77 - 0.44
70	Female	BMA & investigations	24	no
75	Female	Sever back pain	192	no
75	Female	Neutropenic sepsis	144	no
75	Female	Azacitidine	12	0.22
75	Female	Blood products support	24	0.97
75	Female	Blood products support	12	0.08
75	Female	Blood products support	144	0.6
75	Female	Azacitidine	48	0.02
75	Female	Blood products support	144	0.08
56	Female	BMA & investigations	12	0.41
56	Female	Blood products support	24	0.44
56	Female	Blood product support & Colonoscopy	144	0.37 - 12.12 N 1.14
69	Female	R-CVP	24	no	done
69	Female	R-CVP	24	no
65	Female	Neutropenic fever management	24	N 9.34
25	Male	AML induction	552	0.23 - till D	done
25	Male	AML induction	528	17.11 N 0.55 - 28.11 N 0.21
25	Male	AML Consolidation	120	no
25	Male	Neutropenic sepsis management	240	0.21 - till D
74	Female	BMA & investigations	24	no
33	Male	Investigations	24	no
33	Male	Fever & Cellulitis	48	no	done
55	Male	BMA & investigations	24	no
79	Female	BMA & investigations	12	no
6	Female	Cytarabine	72	no
18	Male	R-HD MTX &Cytarabine+Thiotepa	288	no	done
18	Male	Neutropenic management	72	0.03 -till D
18	Male	R-HD MTX &Cytarabine+Thiotepa	120	no
18	Male	Neutropenic fever management	216	0.54
38	Male	GemP	48	no
38	Male	Neutropenic fever management	192	no	done
38	Male	GemP	96	no
38	Male	Abdominal & leg pain	120	no
89	Male	Cyclophosphamide	96	no
40	Male	BMA & FLAG-Ida	528	0.27 (02.01 N 1.1)
2	Male	AML induction	216	0.44 - till D
72	Female	PR bleeding & headache	24	no
45	Female	UTI & paliative care	48	no
60	Female	Paclitaxol	12	no
60	Female	Paclitaxol	24	no	done
46	Male	Enoxaparine & Warfarine	168	no
73	Male	Low GCS	24	no	done
60	Female	Irinotecan,5FU and folinic acid	72	no
60	Female	Irinotecan,5FU and folinic acid	48	no
60	Female	Irinotecan,5FU and folinic acid	48	no
60	Female	Irinotecan,5FU and folinic acid	48	no
60	Female	Irinotecan,5FU and folinic acid	48	no
60	Female	Irinotecan,5FU and folinic acid	72	no
60	Female	Irinotecan,5FU and folinic acid	48	no
60	Female	Irinotecan,5FU and folinic acid	48	no
60	Female	Irinotecan,5FU and folinic acid	48	no
53	Female	Investigations for shoulder pain & hand numbness	24	no
71	Female	BMA,investigations & VTD	48	no
66	Female	CAG	24	no
24	Female	Investigations	24	no
68	Female	Ironitican,5FU & folinic acid	48	no
68	Female	Ironitican,5FU & folinic acid	48	no
35	Male	LN enlargement	72	no
20	Male	Body pain & gum bleeding	216	no	done
20	Male	Dizziness,sweets	120	no
20	Male	for inj Golimumab	24	no
20	Male	for inj Golimumab	24	no
20	Male	for inj Golimumab	24	no
33	Female	Oxaliplatin,5FU,FA & Trastuzumam	48	no
37	Female	Cyclo+Doxo	12	no
37	Female	Cyclo+Doxo	12	no
37	Female	Cyclo+Doxo	12	no
52	Female	Blood products support & Paclitaxol	1	no
60	Female	PRP treatment	24	no
50	Male	Chest pain	24	no
75	Male	Abdominal pain	168	no
64	Female	Docetaxol	12	no
62	Male	Iron sucrose therapy	12	no
62	Male	Iron sucrose therapy	12	no
45	Male	Oxalplatin, 5FU and folinic acid	72	no
45	Male	Oxalplatin, 5FU and folinic acid	48	no
45	Male	Oxalplatin, 5FU and folinic acid	48	no
45	Male	Oxalplatin, 5FU and folinic acid	48	no
45	Male	Oxalplatin, 5FU and folinic acid	48	no
32	Female	Treatment for SLE	12	no
61	Male	upper limb pain	12	no
34	Female	Blood products support	120	no
78	Male	BMA & investigations	72	0
24	Female	Inj Rituximab	12	no
22	Female	Venesection	12	no
32	Female	BMA & investigations	48	no
70	Female	Investigations	12	no
70	Female	Umbilical hernia repair	48	no
49	Female	Neck pain	24	no
66	Male	Insomnia	72	no
24	Female	Investigations	72	no
24	Female	Observation and investigations	24	no
9	Female	Investigations	48	no	done
39	Male	Venesection	48	no
65	Female	Investigations	24	no
58	Male	Carboplatin & Gemcitabine	12	no
24	Female	Blood products support	48	no
66	Female	Chest pain	24	no
73	Male	Abdominal distention & LOA	12	no
33	Female	Investigations	12	no
57	Female	Paclitaxole & Carboplatine	24	no
19	Female	Immunoglobiuline therapy	24	no
52	Male	Investigations	12	no
42	Female	BMA	24	no
58	Female	Cyclophosphamide	12	no
6	Male	Blood product support	24	yes
62	Female	Carboplatin & Paclitaxole	24	no
47	Male	Oxalplatin, 5FU and folinic acid	72	no
47	Male	Oxalplatin, 5FU and folinic acid	72	no
47	Male	Oxalplatin, 5FU and folinic acid	48	no
47	Male	Oxalplatin, 5FU and folinic acid	48	no
47	Male	Oxalplatin, 5FU and folinic acid	72	no
47	Male	Oxalplatin, 5FU and folinic acid	72	no
47	Male	Oxalplatin, 5FU and folinic acid	72	no
47	Male	Oxalplatin, 5FU and folinic acid	48	no
78	Male	Rectal bleeding & fever	120	no
55	Male	Abdominal pain	72	no
67	Female	Neutropenic management	24	no
68	Female	Neutropenic fever	24	0.4
57	Male	Septoplasty	48	no
40	Female	investigations	48	no	done
47	Female	Multiple joint pain with L shoulder pain	24	no
37	Male	SOB,Gum bleeding, chest pain, Investigations	744	no
62	Male	Abdominal distention	72	no
34	Female	BMA	744	no
63	Male	BMA & investigations, PUO	24	no
66	Male	Investigations	24	no
39	Male	BMA & investigations	24	no
68	Female	BMA & investigations	12	no
65	Male	5FU & Folinic acid	48	no
65	Male	5FU & Folinic acid	48	no
50	Male	CAG	12	no
64	Male	Drowsiness	48	no
64	Male	Vomitting & mConstipation	144	no
64	Male	Chest pain & SOB	288	no
64	Male	Ascites	12	no
55	Male	Abdominal pain	48	no
86	Female	Investigations	24	no
86	Female	Pleural fluid aspiration	12	no
58	Male	BMA & investigations	12	no
68	Female	Blood sugar management	24	no
70	Female	Body weakness	120	no
34	Female	SOB and investigations	24	no
60	Female	BMA & investigations	12	no
69	Female	Neutropenic management	24	no
58	Female	Investigations	24	no
53	Male	BMA & investigations	48	no
